# Supplementary material for: Heat Warnings in Switzerland: Reassessing the Choice of the Current Heat Stress Index
Source: MDPI journal article supplement (doi:10.3390/ijerph16152684), 2019-07-27
Supplement: s1 [file s1]

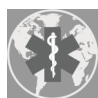

Supplementary

## Heat warnings in Switzerland: Reassessing the choice of the current heat stress index

Annkatrin Burgstall, Ana Casanueva, Sven Kotlarski and Cornelia Schwierz

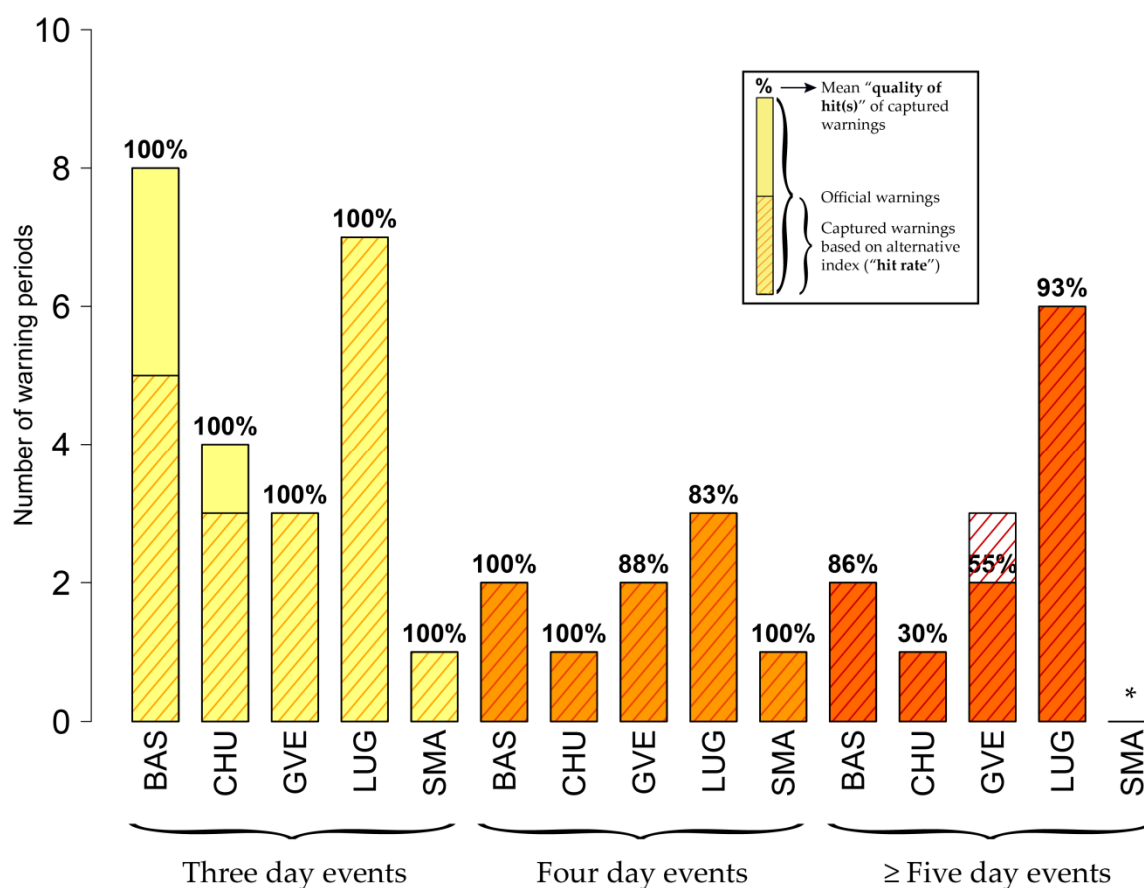

Figure S1. As Figure 10 but for *wbgt.shade*.

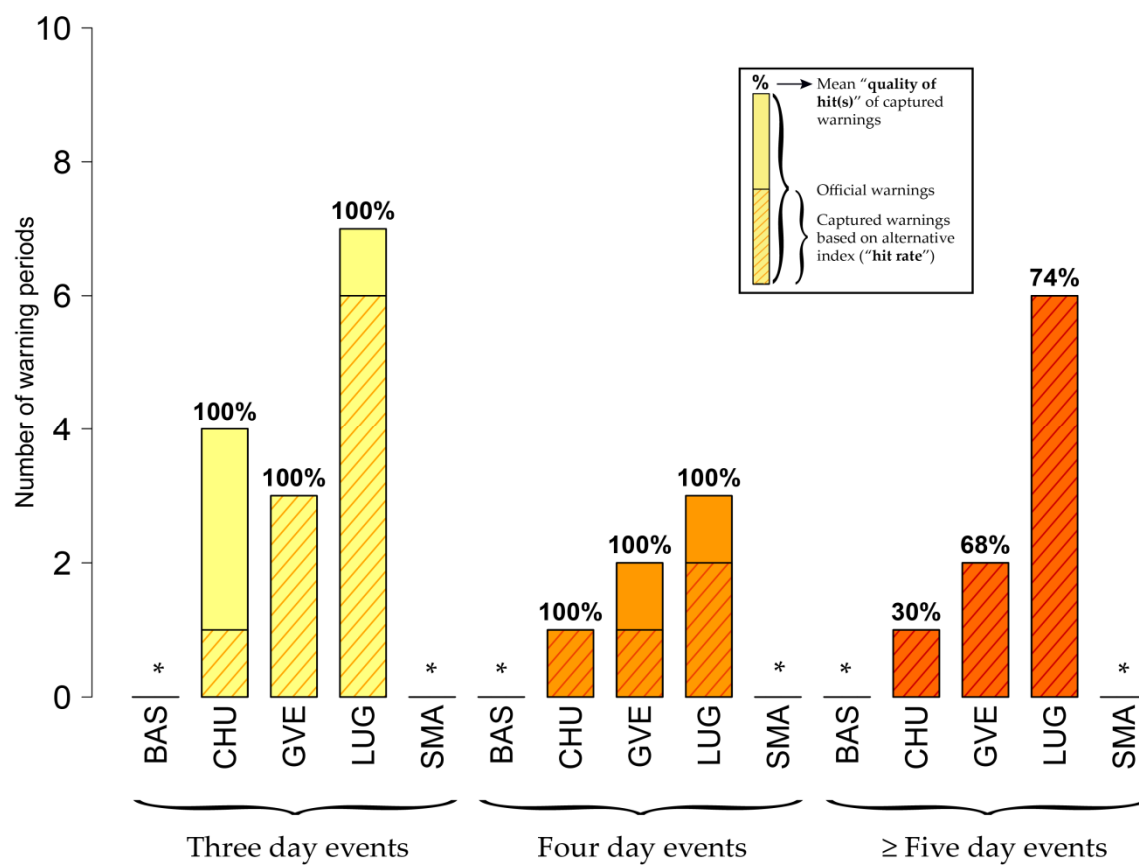

Figure S2. As Figure 10 but for *wbgt.sun*.

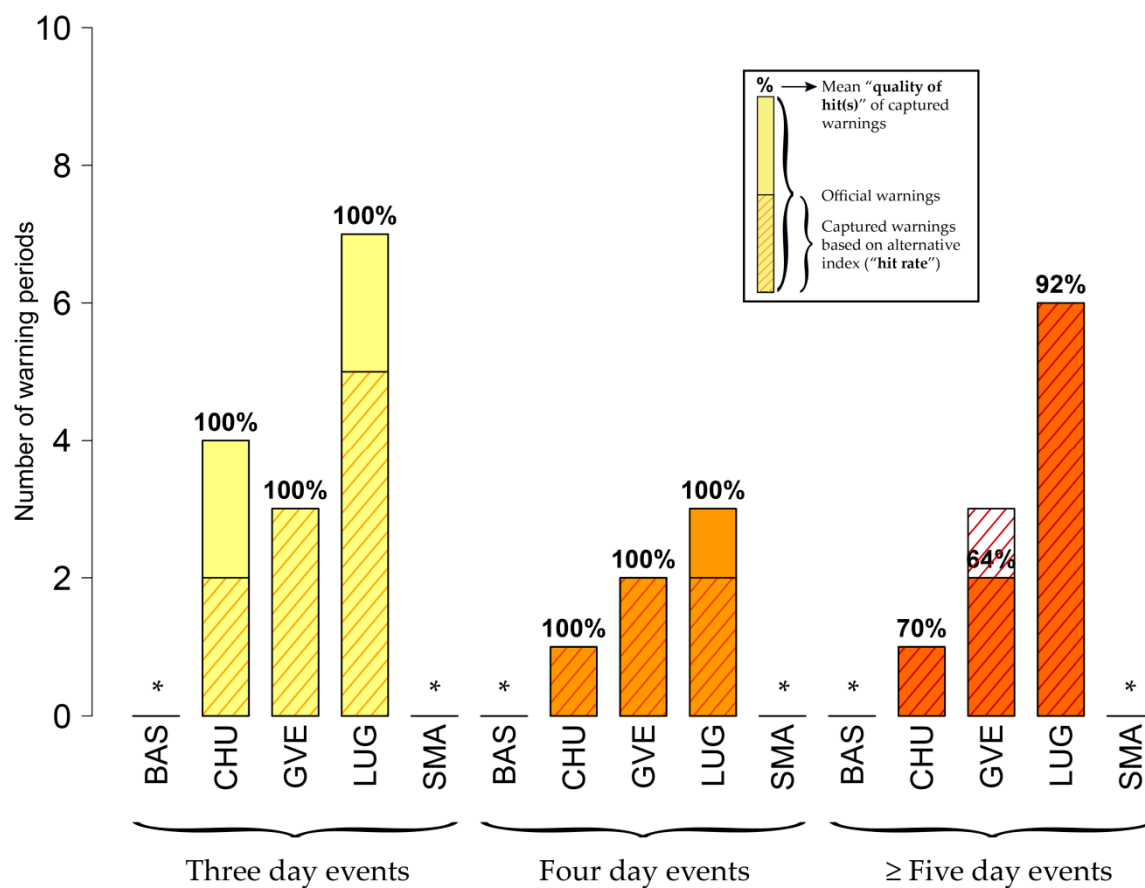

**Figure S3.** As Figure 10 but for *apparentTemp*.

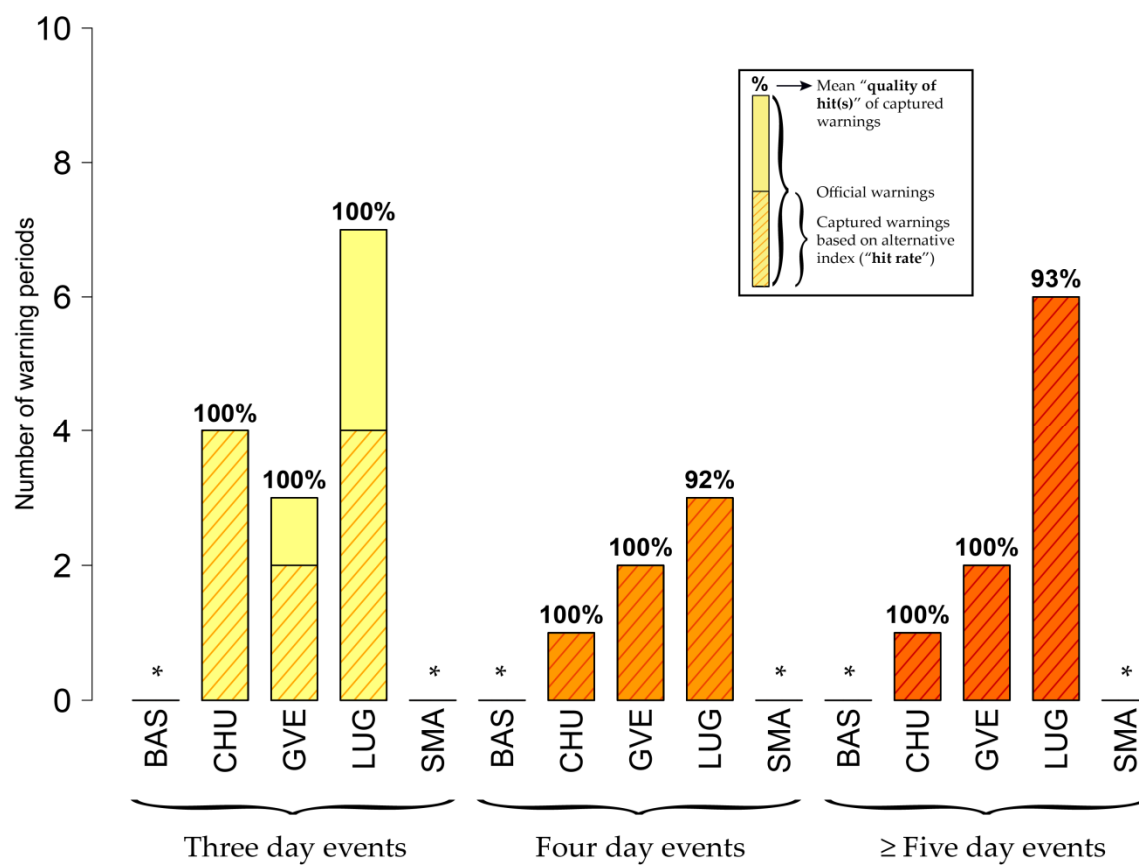

Figure S4. As Figure 10 but for *effectiveTemp*.

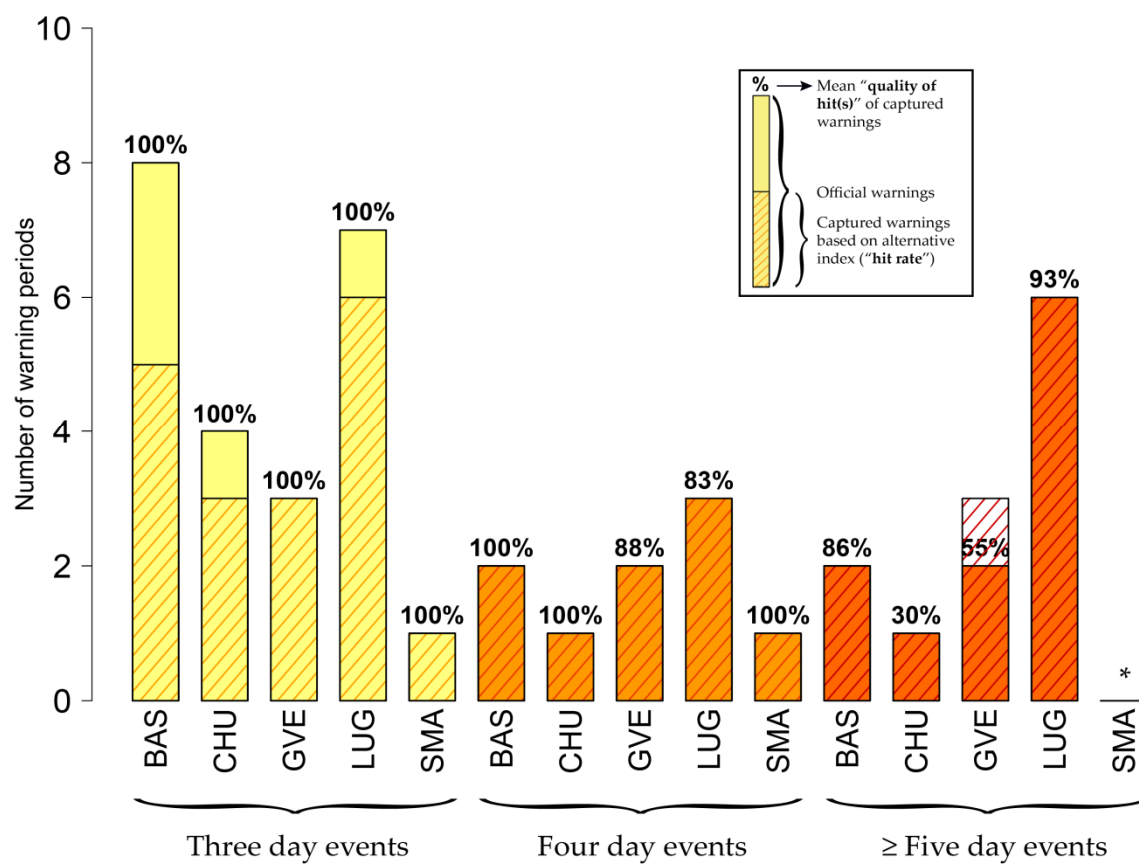

Figure S5. As Figure 10 but for *humidex*.

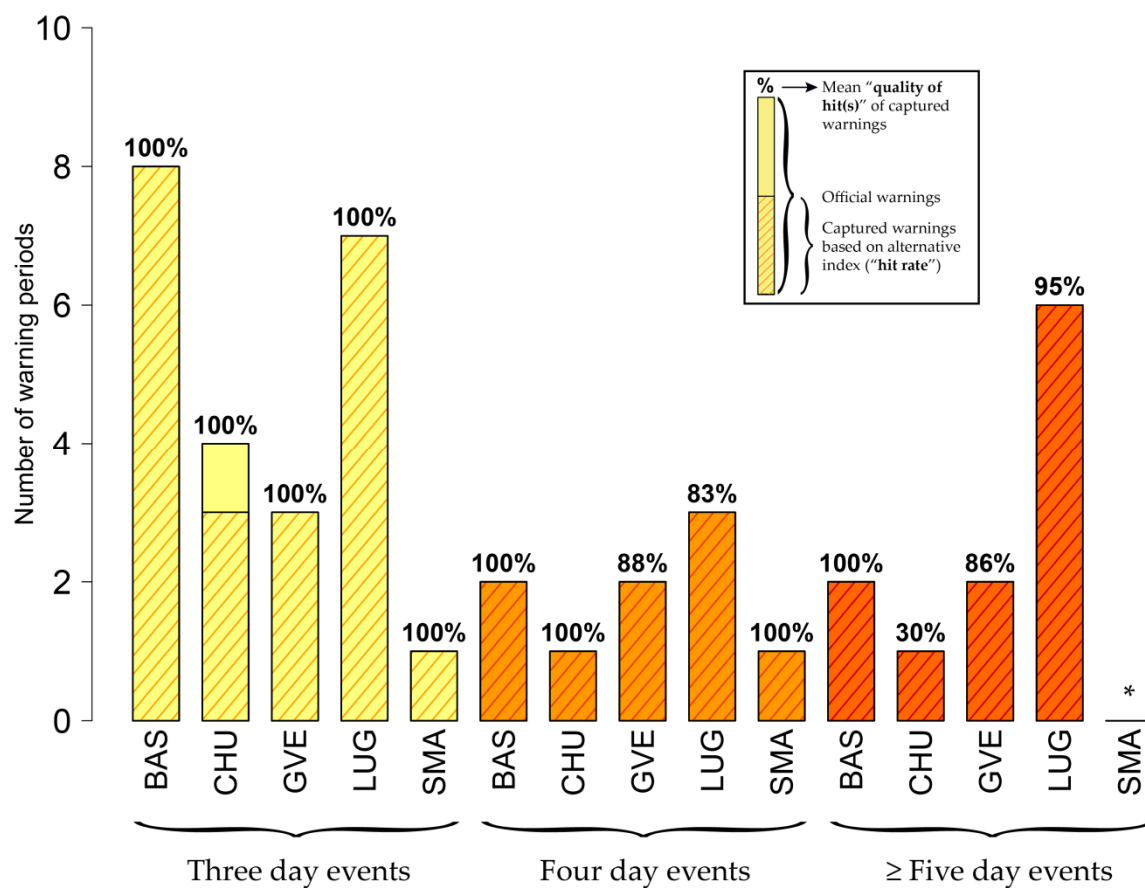

Figure S6. As Figure 10 but for *discomInd*.
